# Supplementary material
Source: Springer Nature journal article supplement (https://www.springermedizin.de/resource/supplementary/12936_2008_670_MOESM4_ESM.pdf/9547964)

Glass Fibre

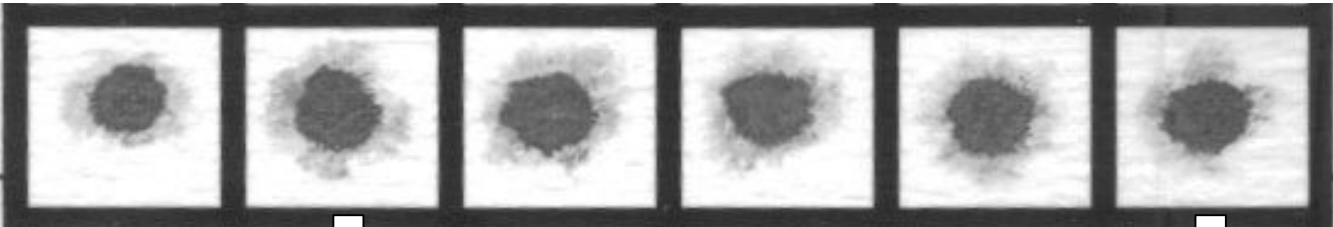

detail

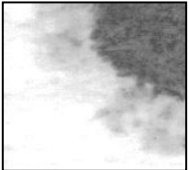

reverse

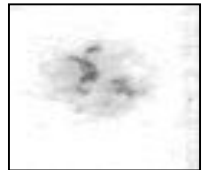

3MM

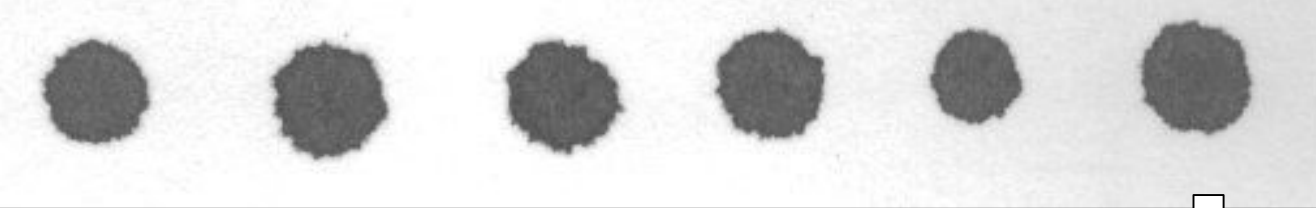

reverse

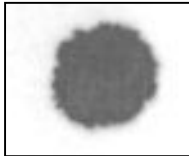

No1

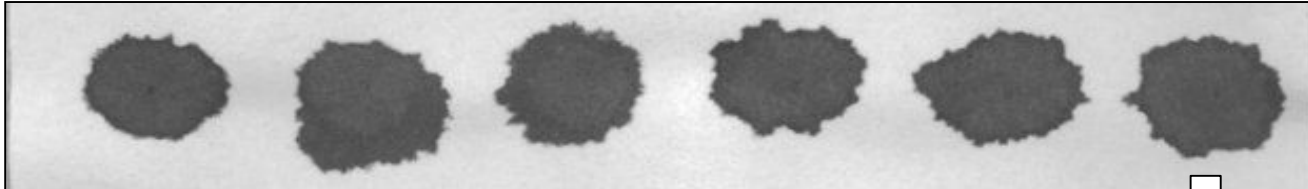

reverse

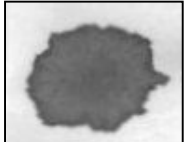

Supplement: MOESM4 [file 9547964]
